# Supplementary material for: Modeling the relationship between melting point of a metal nanowire and its cap surface curvature
Source: Royal Society of Chemistry journal article supplement (doi:10.1039/c5ra01203a), 2015-04-10
Supplement: c5ra01203a1.pdf [file c5ra01203a1.pdf]

# Modeling the relationship between melting point of the metal nanoparticle and its surface curvature

Y. Jiang<sup>1</sup>, K.Zhang<sup>2,3,\*</sup>

<sup>1</sup> Centre for Advanced Macromolecular Design, School of Chemical Engineering,  
University of New South Wales UNSW, Kensington NSW 2052, Australia

<sup>2</sup> Key Laboratory of Microgravity (National Microgravity Laboratory), Institute of  
Mechanics, Chinese Academy of Sciences, Beijing 100190, China

<sup>3</sup> National Engineering Research Central for Rare Earth Materials, General Research  
Institute for Non-Ferrous Metals, GRIREM Advanced Co. Ltd., Beijing100088, China

Email: [zhangkunone@gmail.com](mailto:zhangkunone@gmail.com)

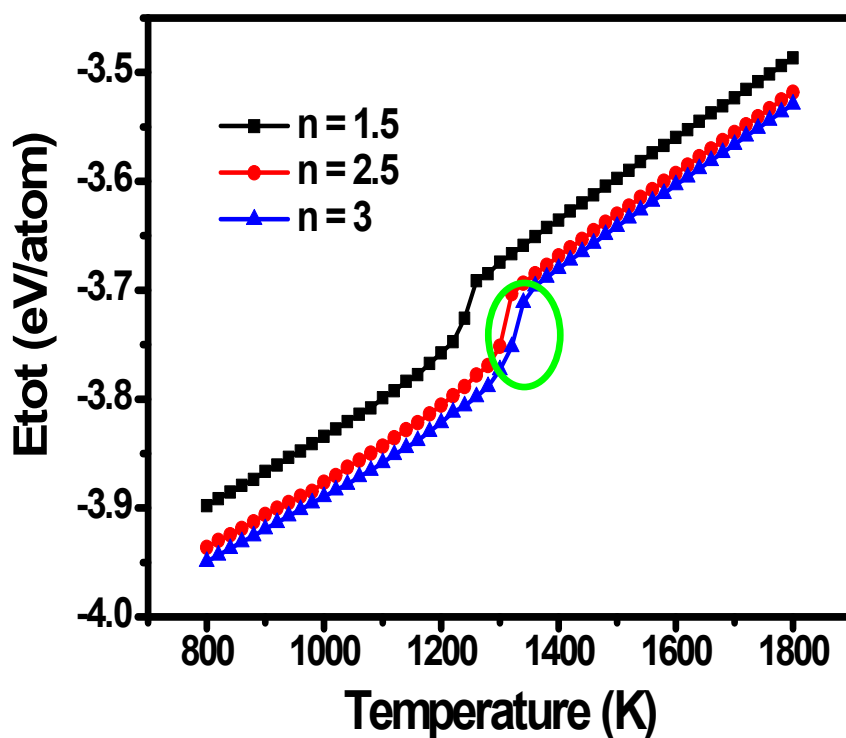

Figure S1. Total energy per atom as a function of temperature for different ratios of length to diameter. It is indicated that when the length-to-diameter ratio of the embedded particle is larger than 2.5, the melting point of the particle is independent on its length.

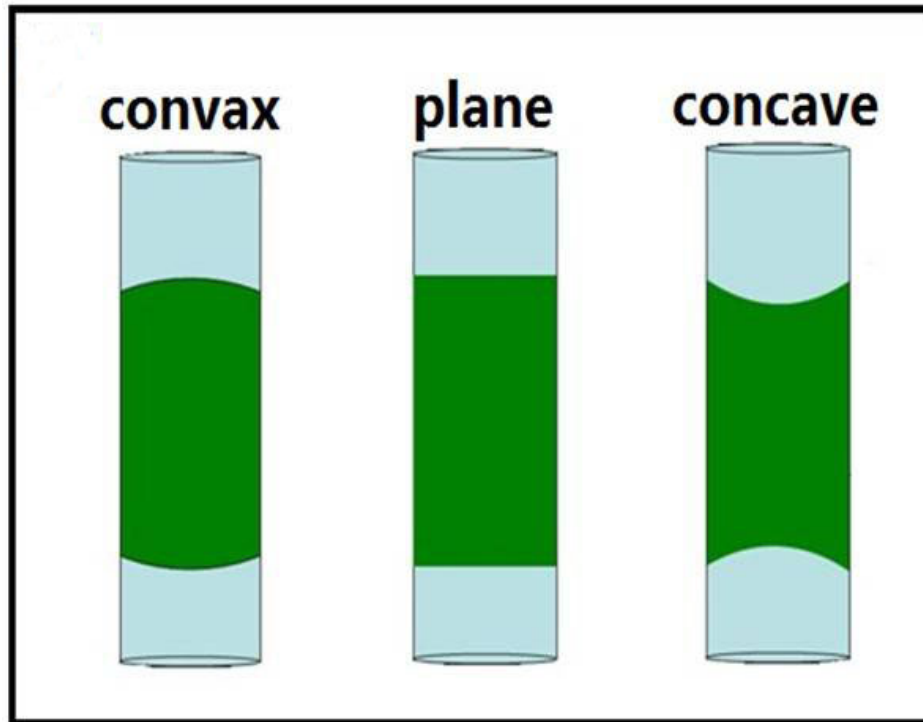

Figure S2. Schematic of the three typical surfaces. With the increase of the confinement-metal interaction by increasing the potential parameter from  $\varepsilon = 0.1$  eV to  $\varepsilon=0.8$  eV, the surface curvature of the Fe melt gradually decreases and the morphology represents three typical statuses (convex, plane and concave).

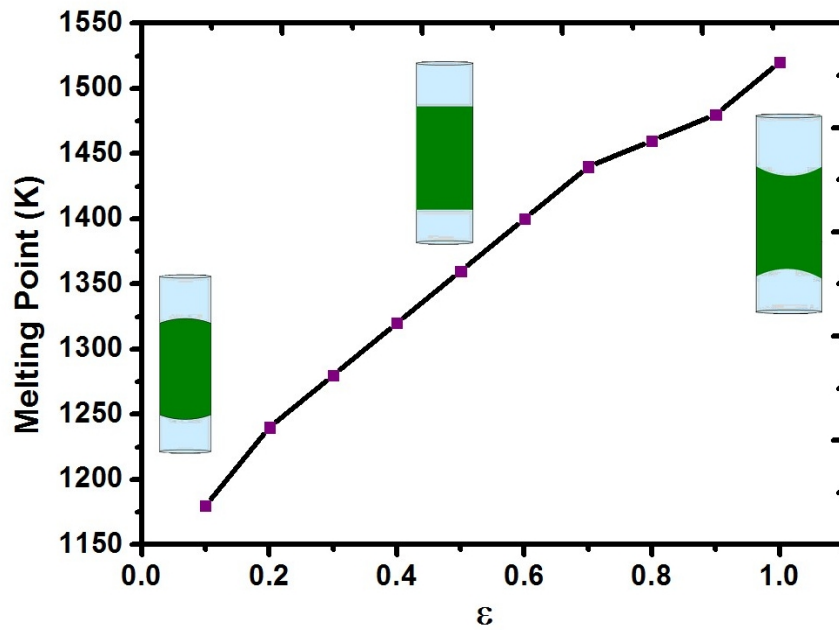

Figure S3. Variation of the melting point of  $\text{Fe}_{1000}$  in nanoconfinement with the confinement-metal interaction strength increasing from  $\epsilon=0.1$  to  $\epsilon=1.0$  eV. The diameter of the confinement is 16 Å. It can be seen that the curve represents a linear relationship between the melting point and the interaction strength  $\epsilon$ .

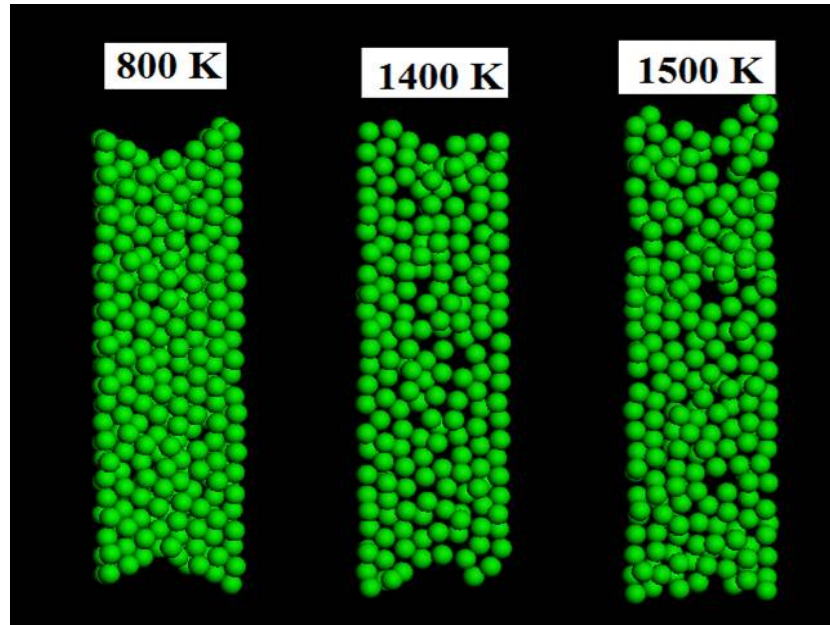

Figure S4. The evolution of the Fe<sub>1000</sub> inner structure during the melting processing at  $\epsilon=1.0$ . With the temperature rising, the embedded particle slowly melts from inner to interface and then completely melts. This is another evidence of the inner-diffusing melting.
